# Supplementary material
Source: publisher figshare collection journal article supplement (https://acs.figshare.com/ndownloader/files/34382019)
Supplement: Supplementary file 1 [file 34382019]

# Supporting Information

## Synergistic Effect of Au-PdO Modified Cu-doped $K_2W_4O_{13}$ Nanowires for Dual Selectivity High Performance Gas Sensing

*Shah Zeb,<sup>a,b,c</sup> Yu Cui,<sup>c</sup> Heng Zhao,<sup>c</sup> Ying Sui,<sup>c</sup> Zhen Yang,<sup>c</sup> Zia Ullah Khan,<sup>d</sup> Shah Masood*

*Ahmad,<sup>d</sup> Muhammad Ikram,<sup>a,b</sup> Yongxiang Gao,<sup>a\*</sup> and Xuchuan Jiang<sup>c\*</sup>*

<sup>a</sup>Institute for Advanced Study, Shenzhen University, Nanhai Avenue 3688, Shenzhen 518060, PR China.

<sup>b</sup>College of Physics and Optoelectronic Engineering, Shenzhen University, Shenzhen 518060, PR China.

<sup>c</sup>School of Chemistry and Chemical Engineering, Institute for Smart Materials and Engineering, University of Jinan, No. 336 Nanxinzhuang West Road, 250022, Jinan, PR China.

<sup>d</sup>National Centre of Excellence in Physical Chemistry, University of Peshawar, Peshawar 25120,

Pakistan

### Corresponding Author

\* Y. Gao (E-mail: [yongxiang.gao@szu.edu.cn](mailto:yongxiang.gao@szu.edu.cn)) \* X. Jiang (E-mail: [ism\\_jiangxc@ujn.edu.cn](mailto:ism_jiangxc@ujn.edu.cn))

## S1. MATERIALS

Sodium tungstate dihydrate ( $\text{Na}_2\text{WO}_4 \cdot 2\text{H}_2\text{O}$ , 99.5%), palladium (II) chloride ( $\text{PdCl}_2$  ( $\geq 99.9\%$ ) Sigma Aldrich), hydrogen tetrachloroaurate (III) trihydrate ( $\text{HAuCl}_4 \cdot 3\text{H}_2\text{O}$  ( $\geq 99.9\%$ ) Sigma Aldrich), potassium sulfate ( $\text{K}_2\text{SO}_4$ , 99%), copper (II) chloride dehydrate ( $\text{CuCl}_2 \cdot 2\text{H}_2\text{O}$ ), nickel chloride ( $\text{NiCl}_2$ ), ferric chloride hexahydrate ( $\text{FeCl}_3 \cdot 6\text{H}_2\text{O}$ ), hydrochloric acid ( $\text{HCl}$ , 37%), ethanol absolute ( $\text{C}_2\text{H}_5\text{OH}$ , 99.8%) were purchased from Macklin, and used. All solutions were carefully prepared in deionized-distilled water (DDI), and during experiments, glassware (Pyrex) was properly washed with aqua regia.

## S2. Synthesis of Doped $\text{K}_2\text{W}_4\text{O}_{13}$ Nanowires

Cu-doped  $\text{K}_2\text{W}_4\text{O}_{13}$  nanowires were synthesized by hydrothermal method, as follows “1.65 g of  $\text{Na}_2\text{WO}_4 \cdot 2\text{H}_2\text{O}$  was dissolved in 40 mL of distilled water-ethanol mixtures, and the water/ethanol volume ratio was kept 7:1. Then, a 3 M  $\text{HCl}$  aqueous solution was added dropwise to the tungsten solution under continuous stirring until pH to 2. After that, different amounts of  $\text{CuCl}_2 \cdot 2\text{H}_2\text{O}$  (1.0 wt%, 2.0 wt%, and 3.0 wt%, Cu/W) were added (**Table S1**) into the W-precursor solution. 2.6 g of  $\text{K}_2\text{SO}_4$  was mixed into the above clear solution and stirred for 30 min. The white turbid solution was then poured slowly into the

Teflon-lined stainless-steel autoclave for hydrothermal treatment at 180 °C for 20 h. Finally, Cu-doped  $K_2W_4O_{13}$  samples (WOC) were collected by centrifugation and dried at 60 °C. Similar procedures were carried for Ni-doped  $K_2W_4O_{13}$  and Fe-doped  $K_2W_4O_{13}$ , instead of without  $NiCl_2$  and ferric chloride ( $FeCl_3 \cdot 6H_2O$ ) as resources of Ni and Fe, and either of them. Water/Ethanol co-solvent volume ratio (40:0, 19:1, 7:1, 3:1, & 1:1) was adjusted by varying the volume of ethanol, keeping the total volume at 40 mL.

### **S3. Preparation of AuPdO Modified Cu-doped $K_2W_4O_{13}$ Nanowires**

The PdO, Au, and Au-PdO nanoparticles were decorated onto the WOC by impregnation<sup>1</sup> and *in-situ* reduction<sup>2</sup>. The first step was to prepare PdO decorated WOC; 100 mg of WOC sample was dispersed in 10 mL of ethanol and stirred for an hour, then 240  $\mu$ L  $PdCl_2$  (0.05 M) was dropped, and the resultant suspension quaked for 8 h. Thus, PdO-WOC composite (0.96wt%) was recovered after washing and drying, named PWOC. Similarly, 0.05 to 0.5wt% PdO decorated WOC were also prepared by variation of  $PdCl_2$  solution in the range of 80-480  $\mu$ L. The ultrathin  $K_2W_4O_{13}$  nanowires have high surface energy, which is further improved by Cu-doping. Ethanol solvent provides weak reducing media, leading to the formation of PdO-WOC nanocomposites.

The Au nanoparticles were also loaded in which 80  $\mu$ L of  $HAuCl_4 \cdot 3H_2O$  solution (0.05 M) was dropped into a water suspension containing 80 mg of well-dispersed PdO-WOC sample. 200  $\mu$ L of  $NaBH_4$  (0.05 M) drop-wise added and then quaked for 6 h. The product Au-PWOC with

(0.96wt% Pd & 2.40wt% Au) was collected. Finally, the recovered 3wt% Au-PWOC samples named APWOC were then kept to calcination at 380 °C for 4 h. For comparison, sample 1.5wt% and 5wt% APWOC samples were also prepared in which the  $\text{HAuCl}_4 \cdot 3\text{H}_2\text{O}$  solution concentrations varied from 80-360  $\mu\text{L}$ .

#### **S4. Materials Characterization**

The shape and size of the sensor samples were studied by field emission scanning electron microscope (FESEM, Quanta FEG250, facilitated with energy-dispersive X-ray spectroscopy (EDS), transmission electron microscope (TEM, JEOL, JEM-1400), and high-resolution TEM (HRTEM, JEOL 2100 F). The X-ray photoelectron spectroscopy (XPS) was studied by SmartLabSE, Rigaku with the  $\text{Cu K}\alpha$ ,  $h\nu=284.6$  eV. The composition and samples crystallinity were studied by X-ray diffraction spectroscopy (XRD, SmartLabSE, Rigaku) with  $\text{Cu-K}\alpha$  radiation ( $\lambda = 1.5418 \text{ \AA}$ ). Nitrogen adsorption and desorption processes were studied by Kubo X1000. The Brunauer–Emmett–Teller (BET) and Barrett–Joyner–Halenda (BJH) schemes were used to measure the specific surface area ( $S_{\text{BET}}$ ) and the pore size distribution. Before BET experiments, sample batches were properly heated under vacuum at 200 °C for 6 h. UV–vis diffuse reflection spectroscopy (DRS) was obtained on a Shimadzu UV-3600 spectrophotometer

in BaSO<sub>4</sub> as a reference standard.

## S5. Sensing Measurements

The sensing properties of the fabricated sensors were examined with CGS-MT Mini, Multi-functional Probe Station (Beijing Sino Aggtech Co. Ltd., China), following a static gas-sensing procedure.<sup>2</sup> A proper amount of pristine, doped, and surface-modified samples were mixed with ethanol which was then drop-casted on the Ag-Pd printed alumina substrate with a microsyringe to form a thin layer as the sensor material. After coating, the sensors were dried at 60 °C on a heating plate, followed by sintering for 2 h at elevated temperature of 200 °C in the sealed chamber of the sensor system to remove aqueous impurities. During the measurements, the fabricated sensors were heated to the working temperatures ranging from 50 to 300 °C to achieve a stable resistance in air ( $R_a$ ). The volume of liquids for testing target gases was measured in microliters (μL) and was injected through a microsyringe into the test chamber for gas detection. The following formula was used to calculate the concentration of gas;

$$Q=(V\times C\times M)/(22.4\times d\times\rho)\times10^{-6}\times(273+T_R)/(273+T_B) \quad (1)$$

Where,

Q is the volume of the liquid to be taken (μL); V is the volume of the test bottle (mL); M is the molecular weight of the substance (g); d is the purity of the liquid; C is the concentration of the

gas to be formulated (ppm);  $\rho$  is the density of the liquid ( $\text{g}/\text{cm}^3$ );  $T_R$  is the test ambient temperature ( $^{\circ}\text{C}$ );  $T_B$  is the temperature inside the test bottle ( $^{\circ}\text{C}$ ).

Here, liquid 3H-2B, TEA and some other VOCs were injected through a microsyringe into the testing chamber and heated above their boiling points for the preparation of gases, which led to a new steady resistance, known as sensor's resistance in the test gas ( $R_g$ ). The  $\text{NH}_3$  gas tested in this work is wet due to trace water. To investigate the effect of  $\text{H}_2\text{O}$  molecules during the  $\text{NH}_3$  sensing, control experiments of pure water were conducted and we found negligible influence under the reported conditions. The sensitivity of the sensors was assessed by the parameter  $S=R_a/R_g$ . All the gas sensing measurements were conducted in a clean room at  $25^{\circ}\text{C}$  and a relative humidity (RH) of 18%. After optimization, the operating temperature was set to  $120^{\circ}\text{C}$  for 3H-2B and  $200^{\circ}\text{C}$  for TEA at a controlled RH value of 12%.

**Table S1** Preparation of different contents of Cu-K<sub>2</sub>W<sub>4</sub>O<sub>13</sub> materials;

| Sensor materials                                    | Na <sub>2</sub> WO <sub>4</sub> ·2H <sub>2</sub> O (mg) | CuCl <sub>2</sub> ·2H <sub>2</sub> O (mg) | Water/Ethanol (7:1 Volume) | K <sub>2</sub> SO <sub>4</sub> (mg) | Temperature (°C) | Time (h) |
|-----------------------------------------------------|---------------------------------------------------------|-------------------------------------------|----------------------------|-------------------------------------|------------------|----------|
| K <sub>2</sub> W <sub>4</sub> O <sub>13</sub>       | 1.65                                                    | 0                                         |                            |                                     |                  |          |
| 1% Cu-K <sub>2</sub> W <sub>4</sub> O <sub>13</sub> | 1.65                                                    | 0.007                                     |                            |                                     |                  |          |
| 2% Cu-K <sub>2</sub> W <sub>4</sub> O <sub>13</sub> | 1.65                                                    | 0.017                                     | 35 mL+5 mL                 | 2.6                                 | 180              | 20       |
| 3% Cu-K <sub>2</sub> W <sub>4</sub> O <sub>13</sub> | 1.65                                                    | 0.025                                     |                            |                                     |                  |          |

**Table S2.** Preparation parameters of PdO modified Cu-doped K<sub>2</sub>W<sub>4</sub>O<sub>13</sub> composite

| Samples                                                      | WOC (mg) | H <sub>2</sub> O (mL) | PdCl <sub>2</sub> (μL) | NaBH <sub>4</sub> (0.05 M) | Pd ICP (Wt%) | Pd (Wt%) |
|--------------------------------------------------------------|----------|-----------------------|------------------------|----------------------------|--------------|----------|
| 2 wt% Cu doped K <sub>2</sub> W <sub>4</sub> O <sub>13</sub> | 60       | 20                    | -                      |                            | -            |          |
| 0.05 wt% Pd-WO <sub>3</sub>                                  | 60       | 20                    | 80                     | 50                         | 0.053        | 0.12     |
| 0.5 wt% Pd-WO <sub>3</sub>                                   | 60       | 20                    | 160                    | 50                         | 0.09         | 0.26     |
| 1 wt% Pd-WO <sub>3</sub>                                     | 60       | 20                    | 240                    | 50                         | 0.198        | 0.96     |

**Table S3.** Preparation parameters of Au modified Cu–doped  $K_2W_4O_{13}$  composite

| Samples                       | WOC  | H <sub>2</sub> O | HAuCl <sub>4</sub> | NaBH <sub>4</sub> | Au ICP | Au   |
|-------------------------------|------|------------------|--------------------|-------------------|--------|------|
|                               | (mg) | (mL)             | ( $\mu$ L)         | (0.05 M)          | (Wt%)  | Wt%  |
| 2 wt% Cu doped $K_2W_4O_{13}$ | 60   | 20               | -                  |                   | -      |      |
| 0.05 wt% Pd-WO <sub>3</sub>   | 60   | 20               | 80                 | 150               | 0.197  | 0.12 |
| 0.5 wt% Pd-WO <sub>3</sub>    | 60   | 20               | 120                | 350               | 0.28   | 2.26 |
| 1 wt% Pd-WO <sub>3</sub>      | 60   | 20               | 240                | 350               | 0.465  | 4.96 |

**Table S4.** Preparation parameters of bimetals Au-PdO modified Cu–doped  $K_2W_4O_{13}$  composites

| Samples                    | 1 wt.%  | H <sub>2</sub> O | HAuCl <sub>4</sub> | (0.05 M)          | ICP   | Wt % |
|----------------------------|---------|------------------|--------------------|-------------------|-------|------|
|                            | PdO-WOC | (mL)             | ( $\mu$ L)         | NaBH <sub>4</sub> | Wt%   | Au   |
|                            | (mg)    |                  |                    | ( $\mu$ L)        | Au    |      |
| 2 wt% AuPd-WO <sub>3</sub> | 50      | 20               | 40                 | 150               | 0.129 | 1.56 |
| 3 wt% AuPd-WO <sub>3</sub> | 50      | 20               | 80                 | 300               | 0.224 | 2.40 |
| 5 wt% AuPd-WO <sub>3</sub> | 50      | 20               | 160                | 450               | 0.455 | 4.12 |



## S6. XRD, Optical Absorption and BET Surface Area Analysis

The as-prepared  $K_2W_4O_{13}$ , doped WOC, WON, WOF, and surface decorated samples, i.e., PWOC and APWOC were investigated by XRD as shown in **Figure 3a**. The pure  $K_2W_4O_{13}$  sample (Figure 1a) indexed typical hexagonal  $K_2W_4O_{13}$  (JCPDS # 20-0942) with preferential crystal growth at  $\langle 001 \rangle$  and  $\langle 002 \rangle$  planes, corresponding to substructure reported for nonstoichiometric  $WO_{3-x}$  and consistent with our reported work.<sup>3</sup> No obvious peaks and phase change of tungsten oxide was detected because of the low impurity Cu/Fe doping atoms (**Figure 3a,ii,iii**); however, WON produced certain peaks as shown in **Figure 3iv**. Compared to  $K_2W_4O_{13}$  the diffraction peaks of WOC, WOF, and WON samples show a slight shift to a high angle, suggesting the successful incorporation of impurity atoms into the lattice of tungsten oxide. Furthermore, the XRD patterns of PWOC and APWOC hybrid composite samples calcined at 380 °C for 4 h are shown in **Figure 3v,vi**. There is no obvious Pd/PdO nanoparticles peak on the WOC sample; because the PdO has low-density distribution and small atomic size, making peak strength indiscernible. The Au-PdO nanoparticles loaded to the WOC appeared wide diffraction peaks at 28.28° and 44.54°, correspond to  $\langle 111 \rangle$  and  $\langle 200 \rangle$  planes, describe the gold nanoparticles in (JCPDS # 04-0784) as shown in **Figure 3vi**. The PdO and Au contents were analyzed by EDS elemental mapping and ICP-AES experiments which highlighted the actual amount of PdO and Au on the PWOC and Au-PdO-WOC nanowires, which were closer to the theoretical values.

The UV-vis DRS spectra of the doped and surface modified samples are shown in **Figure 3b**. The smooth absorption curves with no observable hump demonstrate the homogeneous incorporation of metals into the  $K_2W_4O_{13}$  lattices, consistent with the XRD results. Moreover, the WOC, WON, and WOF have lowered absorptivity in the visible region (500–700 nm)

compared to  $K_2W_4O_{13}$ . The intrinsic absorptivity of the WOC sample was maintained with the loading of PdO, Au, and Au-PdO nanoparticles, and the absorption edge is extended toward a higher wavelength. Moreover, due to the LSPR effect of Au nanoparticles, a new band appears around 450-650 nm, particularly for the AWOC sample. The bandgap energy ( $E_g$ ) was estimated from the equation,  $(\alpha h\nu)^{1/2} = A(h\nu - E_g)$ , where  $h$  is the Planck's constant ( $1.69 \times 10^{-19}$ ),  $\nu$  is the light frequency,  $A$  is the dimensional constant,  $\alpha$  is the absorption coefficient, and  $n$  is for direct/indirect transition. The estimated  $E_g$  values are 2.98, 2.73, 2.83, 2.75, 2.6, 2.61, and 2.5 eV for  $K_2W_4O_{13}$ , WOC, WOF, WON, AWOC, PWOC, and APWOC, respectively. Thus, it can be seen that metal incorporation gradually reduces the bandgap energy of tungsten oxide. The oxidation reaction and growth of PdO/Au nanoparticles occur on the surface of WOC. Either surface decoration/fusion of the Cu, PdO, and AuPdO atoms can substitute the W atoms and may occupy the surface lattice sites, thus changing the bandgap energy, specific surface area, and conductivity of the material.<sup>2</sup> The specific surface area ( $S_{BET}$ ) of doped and loaded samples is provided in **Figure S2**. The  $S_{BET}$  derived for WOC, WON, WOF, PWOC, AWOC and APWOC are 70.218, 62.417, 58.757, 72.423, 78.725 and 70.641 m<sup>2</sup>/g, respectively. The  $S_{BET}$  of doped nanostructures is higher than that of  $WO_3$  previously reported.<sup>3,4</sup> The pore size is around 10 nm, demonstrating the mesoporous nature of the particles. Moreover, Pd/PdO, Au, and AuPdO loadings can further increase the surface area. It is noteworthy that loadings of larger-sized noble metals have decreased the  $S_{BET}$ , which may be due to the nanoparticle agglomeration.<sup>1</sup> Generally, the increased  $S_{BET}$  is highly conducive in gas sensing performance.

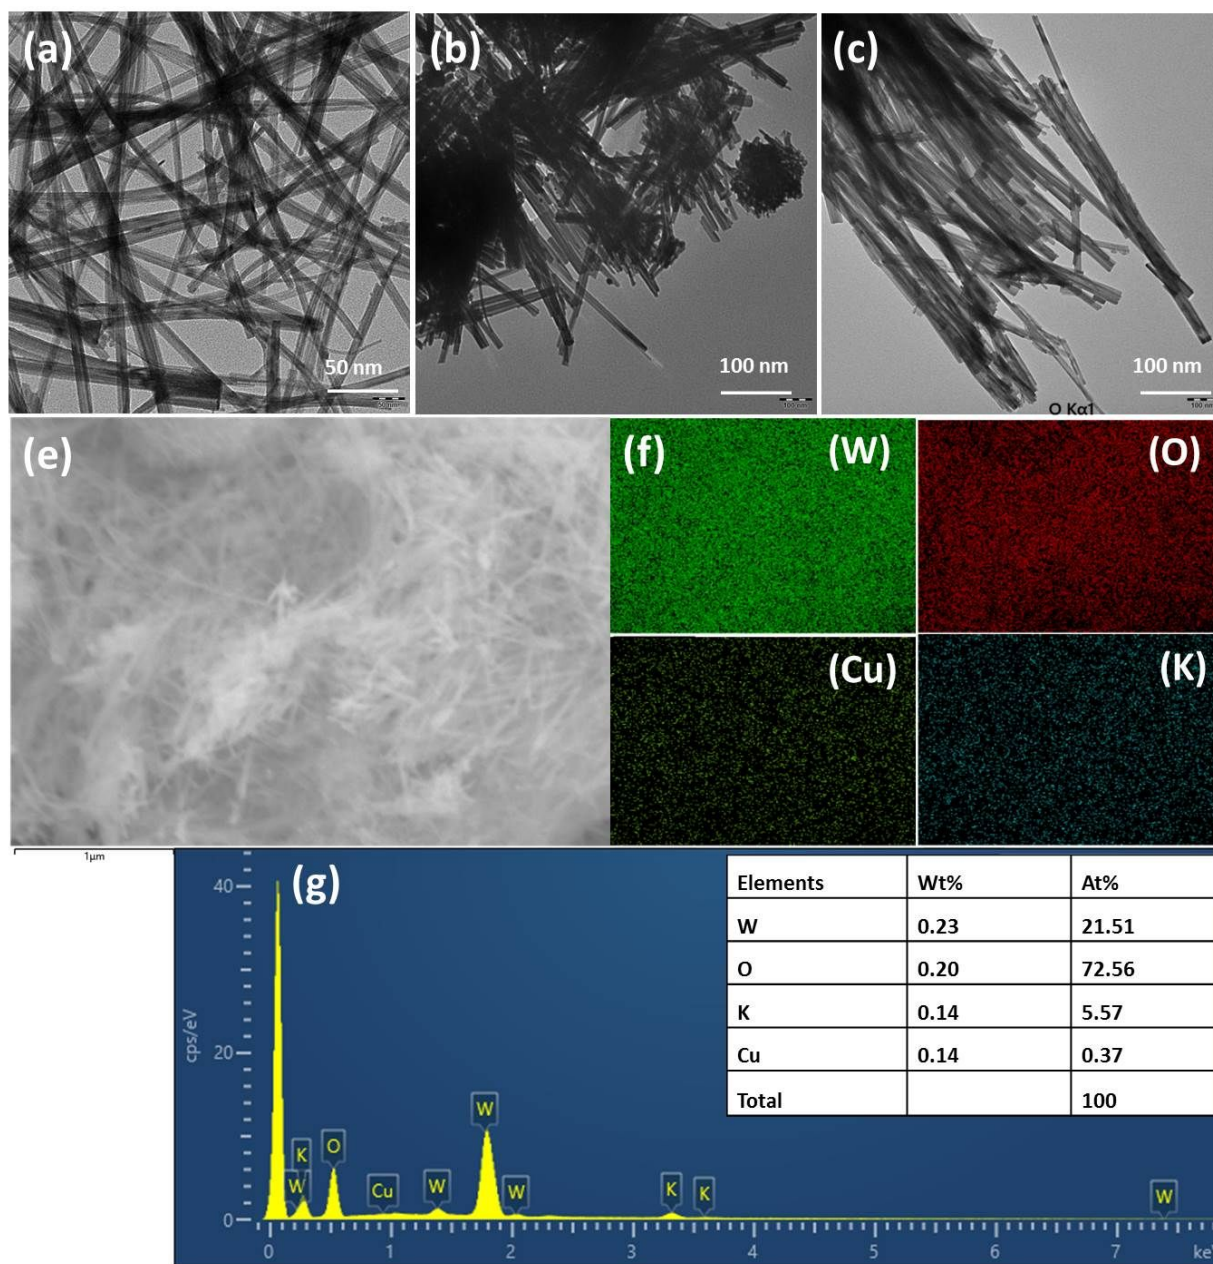

**Figure S1.** TEM image of (a) pristine  $K_2W_4O_{13}$ , (b) Ni-doped  $K_2W_4O_{13}$ , (c) Fe-doped  $K_2W_4O_{13}$ , (d-g) EDS elemental mapping of Cu-doped  $K_2W_4O_{13}$  sample showing the distribution of elements.

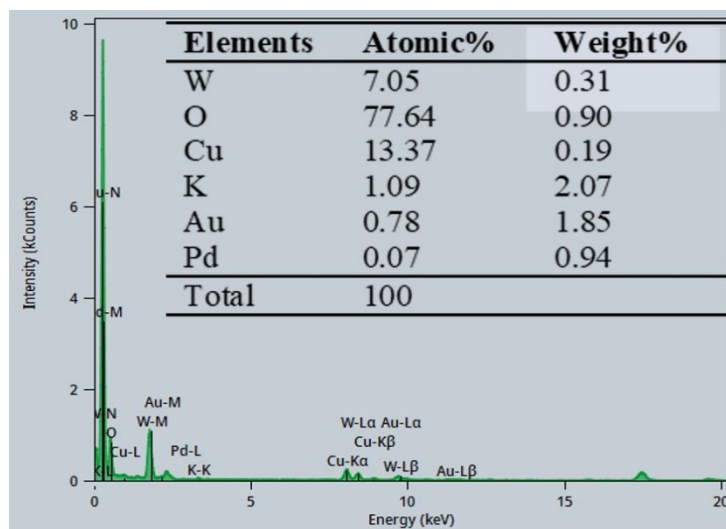

**Figure S2.** EDS elemental mapping showing the distribution of W, O, Cu, K, Pd, and Au elements

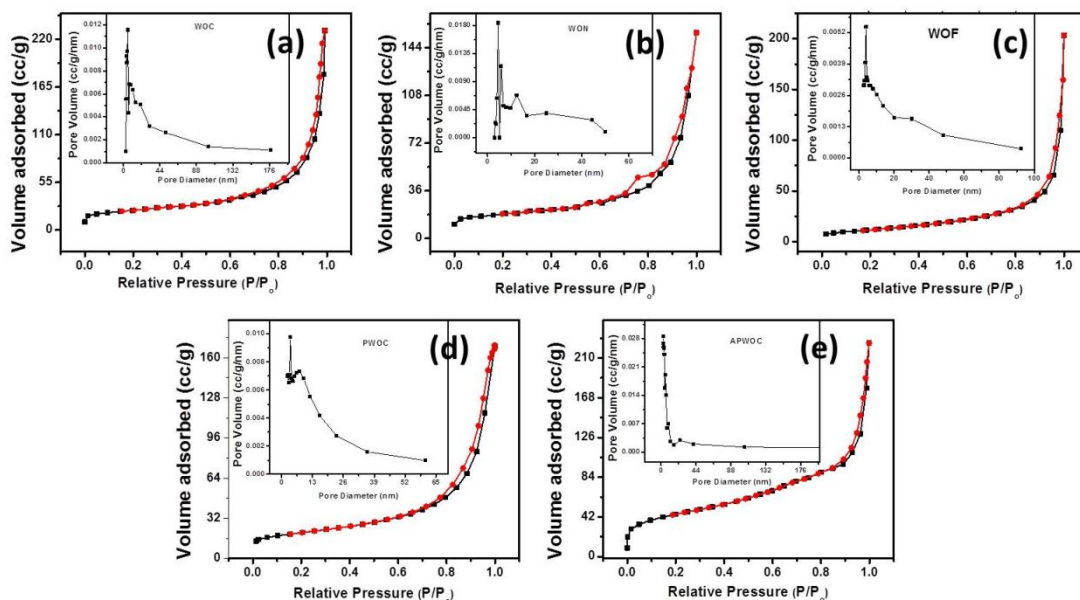

**Figure S3.** Nitrogen ( $N_2$ ) adsorption-desorption curves of Cu-doped (a), Ni-doped (b), and Fe-doped  $K_2W_4O_{13}$  (c) and PdO modified Cu-doped  $K_2W_4O_{13}$ (e), AuPdO modified Cu-doped  $K_2W_4O_{13}$ (e). Inset figures show pore size distribution curves for different morphologies of  $WO_3$  nanowires.

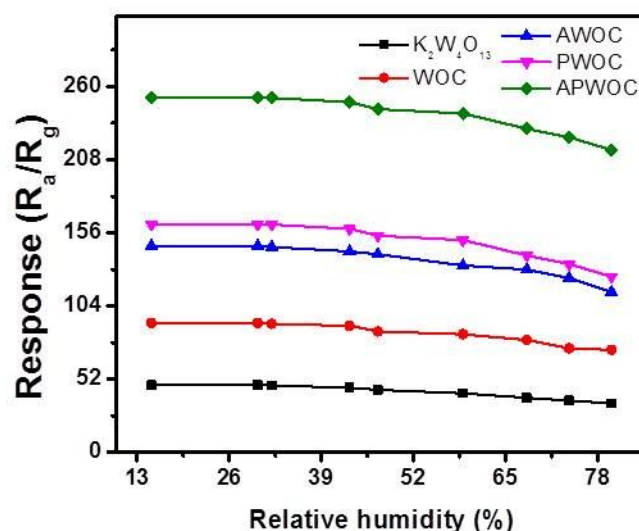

**Figure S4.** The sensor responses variation under relative humidity of 15, 30, 47, 62, 76% RH with 10 ppm 3H-2B.

## References

1. Shang, Y.; Shi, R.; Cui, Y.; Che, Q.; Wang, J.; Yang, P., Urchin-Like  $WO_{2.72}$  Microspheres Decorated With Au and Pdo Nanoparticles for The Selective Detection of Trimethylamine. *ACS Appl Nano Mater* **2020**, 3 (6), 5554-5564.
2. Zeb, S.; Peng, X.; Shi, Y.; Su, J.; Sun, J.; Zhang, M.; Sun, G.; Nie, Y.; Cui, Y.; Jiang, X., Bimetal Au-Pd Decorated Hierarchical  $WO_3$  Nanowire Bundles for Gas Sensing Application. *Sens. Actuators B: Chem* **2021**, 334, 129584.
3. Zeb, S.; Peng, X. J.; Yuan, G. Z.; Zhao, X. X.; Qin, C. Y.; Sun, G. X.; Nie, Y.; Cui, Y.; Jiang, X. C., Controllable Synthesis of Ultrathin  $WO_3$  Nanotubes and Nanowires with Excellent Gas Sensing Performance. *Sensor Actuat B-Chem* **2020**, 305, 127435.
4. Zeb, S.; Sun, G. X.; Nie, Y.; Cui, Y.; Jiang, X. C., Synthesis of Highly Oriented  $WO_3$  Nanowire Bundles Decorated with Au for Gas Sensing Application. *Sens. Actuators B Chem.* **2020**, 321, 128439.
